# Supplementary material for: Can the mechanical activation (polishing) of screen-printed electrodes enhance their electroanalytical response?
Source: Royal Society of Chemistry journal article supplement (doi:10.1039/c6an00167j), 2016-01-01

12 **Electronic Supporting Information (ESI)**

13 **ESI Table 1.**

14 Energy-dispersive X-ray spectroscopy (EDS) for the un-mechanically activated/unpolished  
15 (time = 0) and mechanically activated/polished (alumina slurry) SPEs for times of 0.5, 1.0,  
16 3.0 and 10.0 minutes.

17

| <i>Polished SPEs<br/>(Time)</i> | <i>C<br/>(At%)</i> | <i>O<br/>(At%)</i> | <i>Cl<br/>(At%)</i> | <i>Al<br/>(At%)</i> |
|---------------------------------|--------------------|--------------------|---------------------|---------------------|
| 0 min / unpolished              | 93.76              | 1.84               | 4.39                | -                   |
| 0.5 min                         | 91.85              | 3.66               | 3.93                | 0.57                |
| 1.0 min                         | 89.71              | 5.32               | 3.75                | 1.22                |
| 3.0 min                         | 90.24              | 5.12               | 3.58                | 1.06                |

18

19

20 **ESI Table 2.**

21 Energy-dispersive X-ray spectroscopy (EDS) for the un-mechanically activated/unpolished  
22 and mechanically activated/polished (with diamond spray) SPEs for times of 0.5, 1.0, 3.0 and  
23 10.0 minutes.

24

| <i>Polished SPEs<br/>(Time)</i> | <i>C<br/>(At%)</i> | <i>O<br/>(At%)</i> | <i>Cl<br/>(At%)</i> |
|---------------------------------|--------------------|--------------------|---------------------|
| 0 min                           | 93.76              | 1.84               | 4.39                |
| 0.5 min                         | 93.24              | 2.28               | 4.47                |
| 1.0 min                         | 93.95              | 2.13               | 3.92                |
| 3.0 min                         | 93.53              | 2.33               | 4.15                |
| 10.0 min                        | 94.57              | 3.39               | 3.39                |

25

26

27 **ESI Figure 1.**

28 Typical cyclic voltammetric responses obtained using an SPE in 1 mmol L<sup>-1</sup>  
29 hexaammineruthenium (III) chloride / 0.1 mol L<sup>-1</sup> KCl as a result of varying mechanical  
30 activation/polishing times using alumina slurry. Scan rate: 50 mV s<sup>-1</sup> vs. SCE.

31

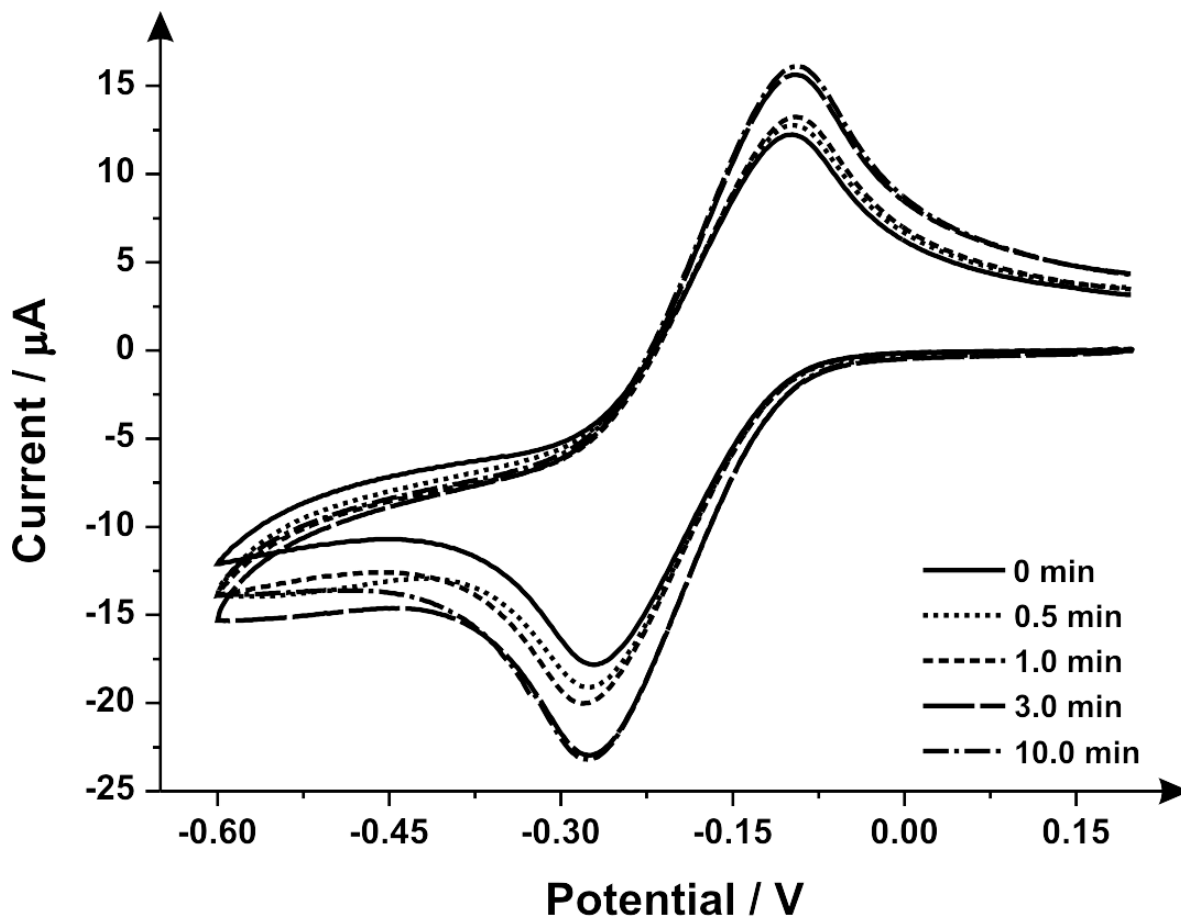

32

33

34

### ESI Figure 2.

Raman spectra of the (a) un-mechanically activated/unpolished SPE, (b) alumina mechanically activated/polished SPE (0.5 min), (c) alumina mechanically activated/polished SPE (1.0 min), (d) alumina mechanically activated/polished SPE (3.0 min) and (e) alumina mechanically activated/polished SPE (10.0 min). Spectra were recorded from various areas across the sample, the spectra shown are representative. Note that spectra have been offset and thus the intensity values (y axis) are reported for reference only.

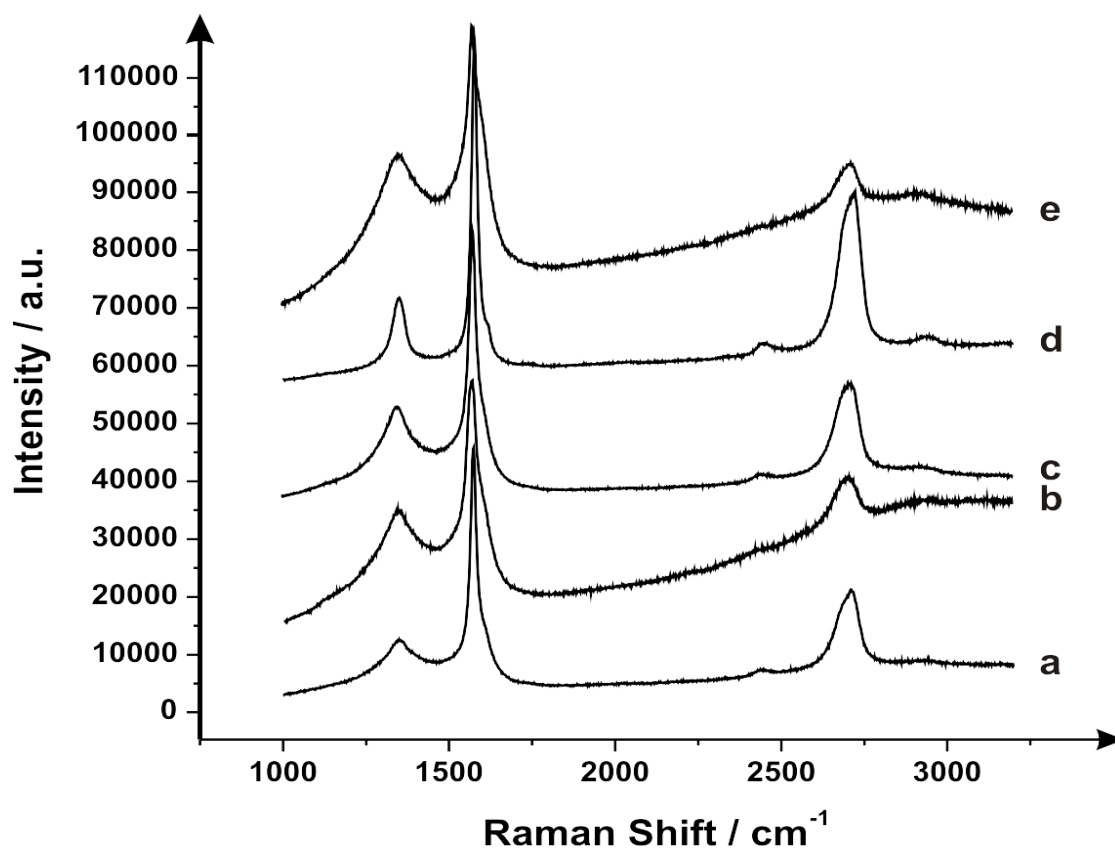

**ESI Figure 3.**

Cyclic voltammograms obtained using un-mechanically activated/ unpolished SPEs modified with 9.2 mg alumina and explored towards the electroanalytical sensing of sodium nitrite. Numbers on graph show the concentration range explored; Scan rate:  $100 \text{ mV s}^{-1}$  vs. SCE.

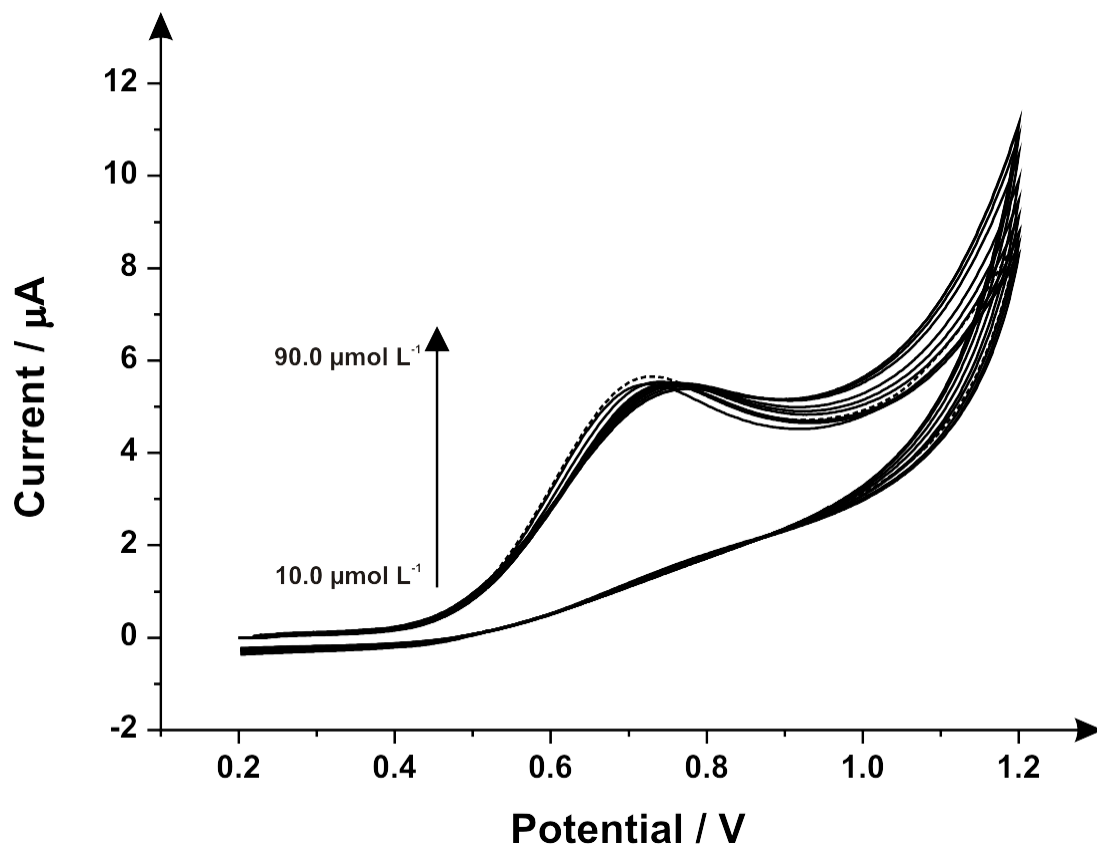

**ESI Figure 4.**

Cyclic voltammetric study of varying SPE mechanical activation/polishing times using diamond spray, solution: 1 mmol L<sup>-1</sup> hexaammineruthenium (III) chloride / 0.1 mol L<sup>-1</sup> KCl. Scan rate; 50 mV s<sup>-1</sup> vs. SCE.

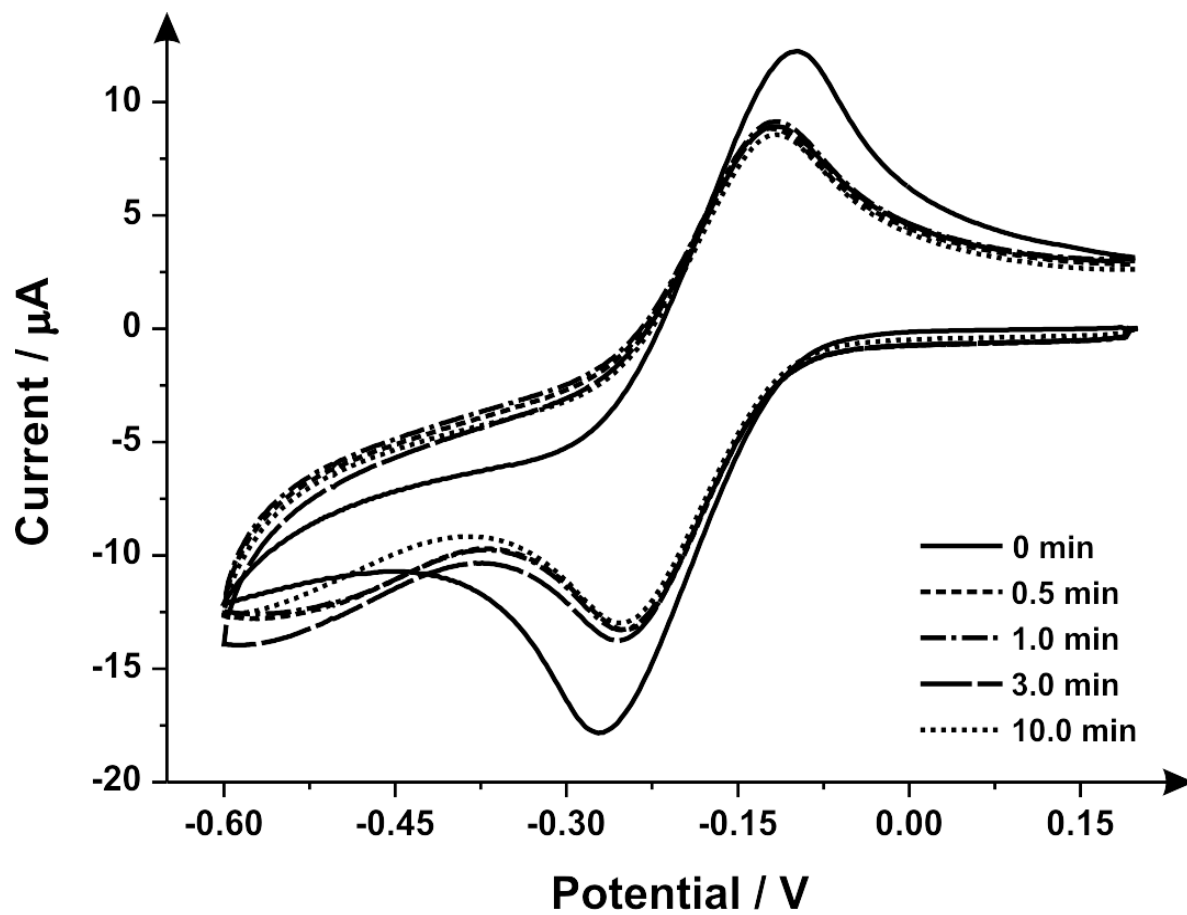

Supplement: c6an00167j1.pdf [file c6an00167j1.pdf]
